# Supplementary material
Source: PubMed Central journal article supplement (PMC4843677)
Supplement: rsif20160008supp1.pdf [file rsif20160008supp1.pdf]

| Eggshell thickness (mm) | Ap (cm <sup>2</sup> ) | R <sub>diff</sub> (day*Torr*mg <sup>-1</sup> ) | G <sub>H<sub>2</sub>O</sub> (mgH <sub>2</sub> O day <sup>-1</sup> Torr <sup>-1</sup> ) derived from R <sub>diff</sub> | G <sub>H<sub>2</sub>O</sub> derived from eq. 1 |
|-------------------------|-----------------------|------------------------------------------------|-----------------------------------------------------------------------------------------------------------------------|------------------------------------------------|
| 0                       | 98.14                 | 1.00E-06                                       | 997793.01                                                                                                             | -                                              |
| 0.02                    | 98.14                 | 9.26E-07                                       | 518584.51                                                                                                             | 1008849.31                                     |
| 0.04                    | 96.31                 | 9.44E-07                                       | 348181.25                                                                                                             | 495003.03                                      |
| 0.06                    | 90.64                 | 1.00E-06                                       | 258076.08                                                                                                             | 310579.65                                      |
| 0.08                    | 95.34                 | 9.53E-07                                       | 207115.66                                                                                                             | 244995.76                                      |
| 0.10                    | 90.49                 | 1.00E-06                                       | 171446.95                                                                                                             | 186027.05                                      |
| 0.12                    | 88.80                 | 1.02E-06                                       | 145850.94                                                                                                             | 152127.01                                      |
| 0.14                    | 85.96                 | 1.06E-06                                       | 126363.61                                                                                                             | 126232.64                                      |
| 0.16                    | 86.27                 | 1.05E-06                                       | 111517.50                                                                                                             | 110854.48                                      |
| 0.18                    | 87.63                 | 1.04E-06                                       | 99955.24                                                                                                              | 100081.61                                      |
| 0.20                    | 90.34                 | 1.01E-06                                       | 90821.94                                                                                                              | 92866.52                                       |
| 0.22                    | 97.91                 | 9.28E-07                                       | 83759.93                                                                                                              | 91494.89                                       |
| 0.24                    | 101.95                | 8.92E-07                                       | 77939.92                                                                                                              | 87333.82                                       |
| 0.26                    | 121.90                | 7.46E-07                                       | 73659.14                                                                                                              | 96385.37                                       |
| 0.28                    | 122.35                | 7.43E-07                                       | 69837.64                                                                                                              | 89834.80                                       |
| 0.31                    | 122.76                | 7.40E-07                                       | 66403.86                                                                                                              | 84122.00                                       |
| 0.33                    | 125.21                | 7.26E-07                                       | 63350.17                                                                                                              | 80443.00                                       |
| 0.35                    | 124.39                | 7.31E-07                                       | 60547.47                                                                                                              | 75215.81                                       |
| 0.37                    | 125.62                | 7.24E-07                                       | 58006.17                                                                                                              | 71735.05                                       |
| 0.39                    | 125.54                | 7.24E-07                                       | 55668.20                                                                                                              | 67917.32                                       |
| 0.41                    | 121.87                | 7.46E-07                                       | 53449.10                                                                                                              | 62637.13                                       |
| 0.43                    | 105.09                | 8.65E-07                                       | 51087.35                                                                                                              | 51438.72                                       |
| 0.45                    | 104.23                | 8.72E-07                                       | 48908.44                                                                                                              | 48699.68                                       |
| 0.47                    | 104.39                | 8.71E-07                                       | 46910.66                                                                                                              | 46652.02                                       |
| 0.49                    | 104.54                | 8.69E-07                                       | 45072.32                                                                                                              | 44775.01                                       |
| 0.51                    | 107.30                | 8.47E-07                                       | 43414.68                                                                                                              | 44117.28                                       |
| 0.53                    | 108.52                | 8.38E-07                                       | 41891.39                                                                                                              | 42903.62                                       |
| 0.55                    | 109.49                | 8.30E-07                                       | 40483.58                                                                                                              | 41685.82                                       |
| 0.57                    | 112.76                | 8.06E-07                                       | 39204.21                                                                                                              | 41395.03                                       |
| 0.59                    | 114.79                | 7.92E-07                                       | 38023.81                                                                                                              | 40686.51                                       |
| 0.61                    | 115.94                | 7.84E-07                                       | 36923.18                                                                                                              | 39726.75                                       |
| 0.63                    | 118.96                | 7.64E-07                                       | 35910.09                                                                                                              | 39445.39                                       |
| 0.65                    | 122.64                | 7.41E-07                                       | 34979.13                                                                                                              | 39394.60                                       |
| 0.67                    | 126.21                | 7.20E-07                                       | 34119.65                                                                                                              | 39314.50                                       |
| 0.69                    | 130.09                | 6.99E-07                                       | 33325.19                                                                                                              | 39329.50                                       |
| 0.71                    | 132.70                | 6.85E-07                                       | 32581.49                                                                                                              | 38973.28                                       |
| 0.73                    | 133.00                | 6.83E-07                                       | 31871.82                                                                                                              | 37976.07                                       |
| 0.75                    | 133.88                | 6.79E-07                                       | 31196.80                                                                                                              | 37195.30                                       |
| 0.77                    | 135.20                | 6.72E-07                                       | 30555.93                                                                                                              | 36571.68                                       |
| 0.79                    | 137.15                | 6.63E-07                                       | 29949.43                                                                                                              | 36147.94                                       |
| 0.81                    | 138.68                | 6.55E-07                                       | 29372.87                                                                                                              | 35638.48                                       |
| 0.83                    | 140.29                | 6.48E-07                                       | 28824.34                                                                                                              | 35173.43                                       |
| 0.85                    | 141.67                | 6.42E-07                                       | 28300.98                                                                                                              | 34673.25                                       |
| 0.88                    | 142.43                | 6.38E-07                                       | 27798.90                                                                                                              | 34047.15                                       |
| 0.90                    | 144.77                | 6.28E-07                                       | 27322.02                                                                                                              | 33820.06                                       |
| 0.92                    | 146.21                | 6.22E-07                                       | 26865.71                                                                                                              | 33398.15                                       |

|      |        |          |          |          |
|------|--------|----------|----------|----------|
| 0.94 | 147.96 | 6.14E-07 | 26429.53 | 33064.31 |
| 0.96 | 148.77 | 6.11E-07 | 26009.54 | 32537.11 |
| 0.98 | 149.29 | 6.09E-07 | 25604.09 | 31970.62 |
| 1.00 | 147.85 | 6.15E-07 | 25207.31 | 31015.42 |
| 1.02 | 146.33 | 6.21E-07 | 24818.70 | 30082.39 |
| 1.04 | 146.65 | 6.20E-07 | 24442.71 | 29558.05 |
| 1.06 | 144.77 | 6.28E-07 | 24073.27 | 28616.98 |
| 1.08 | 143.01 | 6.36E-07 | 23710.49 | 27736.63 |
| 1.10 | 143.69 | 6.33E-07 | 23360.12 | 27351.68 |
| 1.12 | 144.53 | 6.29E-07 | 23021.91 | 27012.31 |
| 1.14 | 144.56 | 6.29E-07 | 22693.42 | 26534.72 |
| 1.16 | 146.17 | 6.22E-07 | 22377.64 | 26359.93 |
| 1.18 | 149.37 | 6.09E-07 | 22077.01 | 26472.27 |
| 1.20 | 152.31 | 5.97E-07 | 21789.93 | 26535.49 |
| 1.22 | 153.35 | 5.93E-07 | 21512.09 | 26271.42 |
| 1.24 | 153.28 | 5.93E-07 | 21241.13 | 25829.79 |
| 1.26 | 154.61 | 5.88E-07 | 20979.15 | 25633.04 |
| 1.28 | 154.71 | 5.87E-07 | 20723.73 | 25243.13 |
| 1.30 | 154.56 | 5.88E-07 | 20474.20 | 24823.65 |
| 1.32 | 152.65 | 5.95E-07 | 20227.60 | 24139.52 |
| 1.34 | 152.10 | 5.98E-07 | 19986.01 | 23688.72 |
| 1.36 | 152.50 | 5.96E-07 | 19750.74 | 23397.00 |
| 1.38 | 153.37 | 5.93E-07 | 19522.23 | 23184.60 |
| 1.40 | 154.22 | 5.89E-07 | 19300.17 | 22974.48 |
| 1.42 | 153.97 | 5.90E-07 | 19082.75 | 22610.00 |
| 1.45 | 155.48 | 5.85E-07 | 18872.21 | 22509.89 |
| 1.47 | 155.10 | 5.86E-07 | 18665.78 | 22143.43 |
| 1.49 | 155.60 | 5.84E-07 | 18464.45 | 21909.66 |
| 1.51 | 155.78 | 5.83E-07 | 18267.64 | 21638.86 |
| 1.53 | 158.48 | 5.74E-07 | 18078.23 | 21720.98 |
| 1.55 | 161.43 | 5.63E-07 | 17896.08 | 21834.33 |
| 1.57 | 163.62 | 5.56E-07 | 17719.91 | 21842.35 |
| 1.59 | 167.96 | 5.41E-07 | 17551.60 | 22134.57 |
| 1.61 | 170.65 | 5.33E-07 | 17389.04 | 22204.56 |
| 1.63 | 169.94 | 5.35E-07 | 17228.80 | 21835.13 |
| 1.65 | 170.63 | 5.33E-07 | 17072.11 | 21653.00 |
| 1.67 | 170.46 | 5.33E-07 | 16918.10 | 21367.75 |
| 1.69 | 170.81 | 5.32E-07 | 16767.15 | 21153.78 |
| 1.71 | 172.04 | 5.28E-07 | 16619.93 | 21053.09 |
| 1.73 | 173.76 | 5.23E-07 | 16476.68 | 21012.94 |
| 1.75 | 174.77 | 5.20E-07 | 16336.69 | 20889.82 |
| 1.77 | 176.50 | 5.15E-07 | 16200.40 | 20854.00 |
| 1.79 | 177.93 | 5.11E-07 | 16067.43 | 20784.08 |
| 1.81 | 175.97 | 5.17E-07 | 15935.18 | 20323.81 |
| 1.83 | 174.01 | 5.22E-07 | 15803.63 | 19873.77 |
| 1.85 | 172.04 | 5.28E-07 | 15672.77 | 19433.62 |
| 1.87 | 169.79 | 5.35E-07 | 15542.37 | 18971.09 |
| 1.89 | 167.71 | 5.42E-07 | 15412.55 | 18537.18 |

|      |        |          |          |          |
|------|--------|----------|----------|----------|
| 1.91 | 167.71 | 5.42E-07 | 15284.88 | 18339.97 |
| 1.93 | 166.71 | 5.45E-07 | 15158.55 | 18038.60 |
| 1.95 | 166.30 | 5.47E-07 | 15033.99 | 17806.15 |
| 1.97 | 165.24 | 5.50E-07 | 14910.69 | 17510.99 |
| 1.99 | 163.96 | 5.54E-07 | 14788.44 | 17197.30 |
| 2.01 | 161.46 | 5.63E-07 | 14666.35 | 16764.41 |
| 2.04 | 158.83 | 5.72E-07 | 14544.28 | 16326.81 |
| 2.06 | 156.77 | 5.80E-07 | 14422.65 | 15954.78 |
| 2.08 | 154.13 | 5.90E-07 | 14301.02 | 15532.39 |
| 2.10 | 151.77 | 5.99E-07 | 14179.58 | 15146.75 |
| 2.12 | 152.52 | 5.96E-07 | 14060.76 | 15074.35 |
| 2.14 | 152.28 | 5.97E-07 | 13943.73 | 14907.87 |
| 2.16 | 151.03 | 6.02E-07 | 13827.70 | 14646.20 |
| 2.18 | 151.33 | 6.01E-07 | 13713.80 | 14538.05 |
| 2.20 | 154.19 | 5.89E-07 | 13603.83 | 14675.67 |
| 2.22 | 156.94 | 5.79E-07 | 13497.48 | 14799.72 |
| 2.24 | 160.42 | 5.67E-07 | 13395.04 | 14990.78 |
| 2.26 | 165.14 | 5.50E-07 | 13297.01 | 15292.76 |
| 2.28 | 167.70 | 5.42E-07 | 13201.86 | 15391.29 |
| 2.30 | 169.88 | 5.35E-07 | 13109.27 | 15453.77 |
| 2.32 | 171.15 | 5.31E-07 | 13018.63 | 15431.92 |
| 2.34 | 174.10 | 5.22E-07 | 12930.74 | 15561.52 |
| 2.36 | 176.20 | 5.16E-07 | 12845.06 | 15614.01 |
| 2.38 | 178.36 | 5.10E-07 | 12761.52 | 15670.16 |
| 2.40 | 180.71 | 5.03E-07 | 12680.14 | 15742.35 |
| 2.42 | 182.95 | 4.97E-07 | 12600.75 | 15803.23 |
| 2.44 | 185.06 | 4.91E-07 | 12523.25 | 15851.95 |
| 2.46 | 189.75 | 4.79E-07 | 12448.57 | 16119.65 |
| 2.48 | 196.07 | 4.64E-07 | 12377.14 | 16519.89 |
| 2.50 | 201.23 | 4.52E-07 | 12308.33 | 16816.93 |
| 2.52 | 205.98 | 4.41E-07 | 12241.84 | 17074.68 |
| 2.54 | 210.80 | 4.31E-07 | 12177.56 | 17334.73 |
| 2.56 | 216.22 | 4.20E-07 | 12115.54 | 17639.44 |
| 2.58 | 220.20 | 4.13E-07 | 12055.25 | 17822.54 |
| 2.61 | 223.81 | 4.06E-07 | 11996.52 | 17973.55 |
| 2.63 | 227.26 | 4.00E-07 | 11939.23 | 18108.75 |
| 2.65 | 231.21 | 3.93E-07 | 11883.46 | 18281.97 |
| 2.67 | 234.46 | 3.88E-07 | 11828.96 | 18397.45 |
| 2.69 | 238.47 | 3.81E-07 | 11775.87 | 18569.90 |
| 2.71 | 241.64 | 3.76E-07 | 11723.94 | 18675.45 |
| 2.73 | 248.88 | 3.65E-07 | 11673.95 | 19091.59 |
| 2.75 | 256.95 | 3.54E-07 | 11625.94 | 19564.91 |
| 2.77 | 265.14 | 3.43E-07 | 11579.79 | 20040.12 |
| 2.79 | 269.84 | 3.37E-07 | 11534.80 | 20245.99 |
| 2.81 | 274.02 | 3.32E-07 | 11490.84 | 20411.11 |
| 2.83 | 274.84 | 3.31E-07 | 11447.33 | 20324.84 |
| 2.85 | 275.36 | 3.30E-07 | 11404.24 | 20217.84 |
| 2.87 | 278.91 | 3.26E-07 | 11362.01 | 20333.20 |

|      |        |          |          |          |
|------|--------|----------|----------|----------|
| 2.89 | 281.33 | 3.23E-07 | 11320.46 | 20365.06 |
| 2.91 | 282.85 | 3.21E-07 | 11279.43 | 20331.99 |
| 2.93 | 283.02 | 3.21E-07 | 11238.71 | 20202.86 |
| 2.95 | 281.38 | 3.23E-07 | 11198.06 | 19947.40 |
| 2.97 | 279.95 | 3.25E-07 | 11157.50 | 19710.09 |
| 2.99 | 278.86 | 3.26E-07 | 11117.07 | 19499.64 |
| 3.01 | 277.29 | 3.28E-07 | 11076.70 | 19258.63 |
| 3.03 | 276.71 | 3.28E-07 | 11036.55 | 19089.91 |
| 3.05 | 274.43 | 3.31E-07 | 10996.35 | 18805.84 |
| 3.07 | 272.89 | 3.33E-07 | 10956.22 | 18576.86 |
| 3.09 | 273.91 | 3.32E-07 | 10916.53 | 18523.22 |
| 3.11 | 273.48 | 3.32E-07 | 10877.07 | 18373.33 |
| 3.13 | 271.86 | 3.34E-07 | 10837.65 | 18146.42 |
| 3.15 | 270.79 | 3.36E-07 | 10798.37 | 17957.78 |
| 3.17 | 272.09 | 3.34E-07 | 10759.56 | 17928.34 |
| 3.20 | 273.20 | 3.33E-07 | 10721.18 | 17887.35 |
| 3.22 | 274.96 | 3.31E-07 | 10683.32 | 17888.32 |
| 3.24 | 276.40 | 3.29E-07 | 10645.92 | 17869.11 |
| 3.26 | 279.15 | 3.26E-07 | 10609.14 | 17933.67 |
| 3.28 | 285.19 | 3.19E-07 | 10573.39 | 18208.26 |
| 3.30 | 291.59 | 3.12E-07 | 10538.66 | 18501.73 |
| 3.32 | 299.62 | 3.03E-07 | 10505.07 | 18894.91 |
| 3.34 | 308.22 | 2.95E-07 | 10472.63 | 19318.33 |
| 3.36 | 316.81 | 2.87E-07 | 10441.25 | 19736.62 |
| 3.38 | 322.63 | 2.82E-07 | 10410.63 | 19978.39 |
| 3.40 | 328.85 | 2.76E-07 | 10380.76 | 20241.28 |
| 3.42 | 333.61 | 2.72E-07 | 10351.48 | 20411.94 |
| 3.44 | 338.24 | 2.69E-07 | 10322.77 | 20572.67 |
| 3.46 | 344.16 | 2.64E-07 | 10294.70 | 20810.13 |
| 3.48 | 346.40 | 2.62E-07 | 10266.97 | 20822.85 |
| 3.50 | 347.22 | 2.62E-07 | 10239.45 | 20750.74 |
| 3.52 | 348.10 | 2.61E-07 | 10212.15 | 20683.32 |
| 3.54 | 349.18 | 2.60E-07 | 10185.07 | 20628.20 |
| 3.56 | 351.03 | 2.59E-07 | 10158.28 | 20618.76 |
| 3.58 | 354.34 | 2.57E-07 | 10131.88 | 20695.24 |
| 3.60 | 357.53 | 2.54E-07 | 10105.85 | 20763.30 |
| 3.62 | 364.45 | 2.49E-07 | 10080.44 | 21046.07 |
| 3.64 | 368.98 | 2.46E-07 | 10055.47 | 21189.05 |
| 3.66 | 370.07 | 2.46E-07 | 10030.70 | 21133.70 |
| 3.68 | 371.84 | 2.44E-07 | 10006.17 | 21117.35 |
| 3.70 | 374.35 | 2.43E-07 | 9981.91  | 21143.04 |
| 3.72 | 376.17 | 2.42E-07 | 9957.90  | 21129.75 |
| 3.74 | 381.61 | 2.38E-07 | 9934.33  | 21318.51 |
| 3.77 | 385.30 | 2.36E-07 | 9911.11  | 21408.43 |
| 3.79 | 384.87 | 2.36E-07 | 9887.96  | 21269.62 |
| 3.81 | 382.23 | 2.38E-07 | 9864.77  | 21010.80 |
| 3.83 | 381.31 | 2.38E-07 | 9841.63  | 20848.57 |
| 3.85 | 377.97 | 2.40E-07 | 9818.39  | 20556.54 |

|      |        |          |         |          |
|------|--------|----------|---------|----------|
| 3.87 | 373.14 | 2.44E-07 | 9794.96 | 20187.40 |
| 3.89 | 368.81 | 2.46E-07 | 9771.37 | 19848.71 |
| 3.91 | 364.72 | 2.49E-07 | 9747.64 | 19526.08 |
| 3.93 | 363.22 | 2.50E-07 | 9723.92 | 19345.27 |
| 3.95 | 363.33 | 2.50E-07 | 9700.32 | 19251.07 |
| 3.97 | 364.85 | 2.49E-07 | 9676.94 | 19232.53 |
| 3.99 | 366.07 | 2.48E-07 | 9653.74 | 19198.49 |
| 4.01 | 367.84 | 2.47E-07 | 9630.77 | 19193.30 |
| 4.03 | 372.61 | 2.44E-07 | 9608.19 | 19344.07 |
| 4.05 | 379.21 | 2.40E-07 | 9586.12 | 19588.02 |
| 4.07 | 384.45 | 2.36E-07 | 9564.44 | 19759.36 |
| 4.09 | 389.88 | 2.33E-07 | 9543.16 | 19938.31 |
| 4.11 | 399.07 | 2.28E-07 | 9522.46 | 20307.34 |
| 4.13 | 406.70 | 2.23E-07 | 9502.24 | 20593.75 |
| 4.15 | 413.81 | 2.20E-07 | 9482.45 | 20851.14 |
| 4.17 | 421.10 | 2.16E-07 | 9463.08 | 21115.14 |
| 4.19 | 428.81 | 2.12E-07 | 9444.14 | 21397.34 |
| 4.21 | 437.38 | 2.08E-07 | 9425.64 | 21719.43 |
| 4.23 | 445.26 | 2.04E-07 | 9407.54 | 22004.36 |
| 4.25 | 450.80 | 2.02E-07 | 9389.73 | 22171.47 |
| 4.27 | 457.03 | 1.99E-07 | 9372.22 | 22370.72 |
| 4.29 | 460.82 | 1.97E-07 | 9354.93 | 22449.64 |
| 4.31 | 468.86 | 1.94E-07 | 9338.00 | 22733.32 |
| 4.34 | 475.94 | 1.91E-07 | 9321.37 | 22968.53 |
| 4.36 | 485.12 | 1.87E-07 | 9305.12 | 23302.09 |
| 4.38 | 494.00 | 1.84E-07 | 9289.22 | 23618.25 |
| 4.40 | 501.67 | 1.81E-07 | 9273.61 | 23873.94 |
| 4.42 | 506.05 | 1.80E-07 | 9258.19 | 23971.47 |
| 4.44 | 510.79 | 1.78E-07 | 9242.96 | 24084.65 |
| 4.46 | 514.57 | 1.77E-07 | 9227.90 | 24152.25 |
| 4.48 | 515.57 | 1.76E-07 | 9212.91 | 24089.24 |
| 4.50 | 515.28 | 1.76E-07 | 9197.96 | 23966.94 |
| 4.52 | 510.73 | 1.78E-07 | 9182.93 | 23648.28 |
| 4.54 | 507.89 | 1.79E-07 | 9167.86 | 23410.99 |
| 4.56 | 501.35 | 1.81E-07 | 9152.65 | 23006.39 |
| 4.58 | 497.28 | 1.83E-07 | 9137.36 | 22718.23 |
| 4.60 | 496.98 | 1.83E-07 | 9122.12 | 22604.10 |
| 4.62 | 492.56 | 1.85E-07 | 9106.79 | 22304.36 |
| 4.64 | 489.96 | 1.86E-07 | 9091.43 | 22089.31 |
| 4.66 | 485.85 | 1.87E-07 | 9075.99 | 21808.43 |
| 4.68 | 481.57 | 1.89E-07 | 9060.47 | 21522.45 |
| 4.70 | 478.48 | 1.90E-07 | 9044.90 | 21291.59 |
| 4.72 | 476.42 | 1.91E-07 | 9029.32 | 21108.80 |
| 4.74 | 475.90 | 1.91E-07 | 9013.78 | 20995.27 |
| 4.76 | 474.86 | 1.91E-07 | 8998.25 | 20859.85 |
| 4.78 | 473.36 | 1.92E-07 | 8982.73 | 20705.12 |
| 4.80 | 473.56 | 1.92E-07 | 8967.27 | 20626.45 |
| 4.82 | 471.78 | 1.93E-07 | 8951.81 | 20462.16 |

|      |        |          |         |          |
|------|--------|----------|---------|----------|
| 4.84 | 471.38 | 1.93E-07 | 8936.38 | 20358.78 |
| 4.86 | 473.98 | 1.92E-07 | 8921.09 | 20385.43 |
| 4.88 | 477.85 | 1.90E-07 | 8905.98 | 20466.43 |
| 4.90 | 485.15 | 1.87E-07 | 8891.15 | 20692.59 |
| 4.93 | 494.68 | 1.84E-07 | 8876.64 | 21011.87 |
| 4.95 | 504.01 | 1.80E-07 | 8862.46 | 21320.27 |
| 4.97 | 512.88 | 1.77E-07 | 8848.56 | 21606.43 |
| 4.99 | 520.99 | 1.74E-07 | 8834.92 | 21858.62 |
| 5.01 | 526.10 | 1.73E-07 | 8821.45 | 21983.26 |
| 5.03 | 529.52 | 1.72E-07 | 8808.12 | 22036.55 |
| 5.05 | 530.43 | 1.71E-07 | 8794.84 | 21985.42 |
| 5.07 | 535.06 | 1.70E-07 | 8781.72 | 22088.19 |
| 5.09 | 542.36 | 1.68E-07 | 8768.82 | 22300.26 |
| 5.11 | 549.96 | 1.65E-07 | 8756.13 | 22522.35 |
| 5.13 | 558.64 | 1.63E-07 | 8743.67 | 22787.23 |
| 5.15 | 566.38 | 1.60E-07 | 8731.42 | 23011.46 |
| 5.17 | 572.44 | 1.59E-07 | 8719.33 | 23166.04 |
| 5.19 | 576.78 | 1.58E-07 | 8707.37 | 23250.24 |
| 5.21 | 583.28 | 1.56E-07 | 8695.57 | 23420.43 |
| 5.23 | 589.99 | 1.54E-07 | 8683.93 | 23597.62 |
| 5.25 | 595.89 | 1.53E-07 | 8672.45 | 23741.32 |
| 5.27 | 598.05 | 1.52E-07 | 8661.03 | 23735.31 |
| 5.29 | 600.14 | 1.51E-07 | 8649.68 | 23726.78 |
| 5.31 | 602.61 | 1.51E-07 | 8638.41 | 23733.16 |
| 5.33 | 603.01 | 1.51E-07 | 8627.18 | 23658.38 |
| 5.35 | 604.33 | 1.50E-07 | 8616.00 | 23619.75 |
| 5.37 | 605.91 | 1.50E-07 | 8604.88 | 23592.04 |
| 5.39 | 609.42 | 1.49E-07 | 8593.85 | 23639.17 |
| 5.41 | 613.52 | 1.48E-07 | 8582.92 | 23708.56 |
| 5.43 | 615.46 | 1.48E-07 | 8572.06 | 23694.34 |
| 5.45 | 613.74 | 1.48E-07 | 8561.19 | 23540.11 |
| 5.47 | 612.80 | 1.48E-07 | 8550.33 | 23416.83 |
| 5.50 | 612.22 | 1.48E-07 | 8539.49 | 23307.83 |
| 5.52 | 611.65 | 1.49E-07 | 8528.67 | 23200.12 |
| 5.54 | 609.80 | 1.49E-07 | 8517.84 | 23045.06 |
| 5.56 | 606.38 | 1.50E-07 | 8506.98 | 22831.90 |
| 5.58 | 604.55 | 1.50E-07 | 8496.11 | 22679.80 |
| 5.60 | 605.47 | 1.50E-07 | 8485.29 | 22631.83 |

---
